# Supplementary material
Source: Springer Nature journal article supplement (https://www.springermedizin.de/resource/supplementary/13063_2012_1257_MOESM1_ESM.pdf/9620474)
Supplement: MOESM1 [file 9620474]

## Screening

Opportunistic recruitment at routine Oral Health Assessment appointment ("dental check-up") or emergency attendance

Excluded:

- Did not meet inclusion criteria

Invited to participate:

- Meets inclusion criteria

Excluded:

- Declined to participate

## Enrolment

Informed Consent

Randomisation (n=400)

## Treatment Allocation

Allocated to control group (n=200)

- Lower & upper molar extracted

Allocated to intervention group (n= 200)

- Lower molar extracted

## Follow-Up

**Review 1** - 1 year post-extraction  
**Review 2** - 5 years post-extraction or when child turns 14 (whichever comes first)

**Review 1** - 1 year post-extraction  
**Review 2** - 5 years post-extraction or when child turns 14 (whichever comes first)

## Analysis

Primary Outcome

- Tipping of lower 2<sup>nd</sup> permanent molar

Secondary Outcomes

- Other measures of tooth position
- Dental treatment required
- COHQoL, anaesthetic

Primary Outcome

- Tipping of lower 2<sup>nd</sup> permanent molar

Secondary Outcomes

- Other measures of tooth position
- Dental treatment required
- COHQoL, anaesthetic
